# Supplementary material
Source: Research Square preprint supplement (doi:10.21203/rs.3.rs-9283272/v1)
Supplement: Supplementary file 1 [file a3246fa6fb0303ce2854d0f9.xlsx]

## Sheet: Sheet1
Subject #	1st Met Length	1st Met Width	Hallux PP Length	Hallux PP Width	Hallux DP Length	Hallux DP Width	2nd Met Length	2nd Met Width	2nd PP Length	2nd PP Width	2nd MP Length	2nd MP Width	2nd DP Length	2nd DP Width	3rd Met Length	3rd Met Width	4th Met Length	4th Met Width	5th Met Length	5th Met Width
1	59.58	12.37	26.23	13.05	22.83	8.3	68.56	7.55	26.01	5.16	12.81	5.81	9.96	4.74	64.15	6.92	61.41	6.4	59.18	7.04
2	55.86	9.87	27.48	10.06	27.18	7.49	70.54	7.52	25.6	4.7	15.87	5.07	10.41	4.09	68.3	6.15	67.02	5.78	62.44	6
3	61.41	10.63	30.68	9.62	21.16	7.33	74.39	6.98	27.36	4.17	12.7	5.48	11.1	5.23	71.76	6.57	68.97	6.29	64.53	6.73
4	63.06	12.75	30.61	14.09	23.57	10.42	75.93	7.34	28.05	5.72	11.4	7.6	13.37	4.22	73.09	8.07	68.55	6.92	63.45	7.97
5	61.58	11.12	29.79	10.79	20.3	7.44	72.37	6.79	26.94	4.94	15.15	5.07	11.58	4.29	69.41	6.01	66.17	5.58	63.09	6.28
6	55.76	10.39	26.38	11.34	23.29	7.6	65.15	6.17	24.25	4.75	8.02	7.14	11.17	4.49	60.49	6.31	57.95	5.69	55.78	5.96
7	54.43	11.79	27.6	11.67	23.04	7.68	68.62	7.88	24.99	4.38	7.77	9.29	13.15	4.11	65.58	6.45	65.94	6.32	61.23	5.91
8	59.08	13.17	32.62	13.86	21.81	8.65	70.6	6.96	28.44	5.61	14.49	5.63	10.94	4.39	65.39	6.63	64.53	6.67	57.3	6.39
9	59.34	13.28	30.47	13.39	27.64	8.83	69.64	8.03	28.12	5.5	13.58	6.75	9.3	4.92	63	6.96	61.19	7.1	60.86	6.92
10	65.26	14.91	28.12	14.51	27.03	10.52	80.54	9.25	28.78	6.7	15.97	8.02	9.56	6.59	74.4	6.97	69.76	7.06	67.38	7.02
11	57.96	9.96	28.65	10.31	18.19	8.8	68.03	6.53	24.71	5.17	10.44	6.15	8.41	5.21	64.5	5.54	60.9	5.61	55.03	5.69
12	60.03	12.41	27.13	13.03	19.76	8.74	71.79	6.56	24.86	6.21	13.94	6.5	8.37	6.81	68.1	5.98	64.28	6.1	59.65	7.29
13	59.39	10.93	29.47	11.04	22.68	8.44	72.53	6.07	26.01	5.47	14.4	5.67	7.59	5.62	66.48	4.92	60.92	4.7	59.39	5.35
14	58.34	11.04	28.4	11.74	22.65	7.89	69.13	6.79	27.19	4.65	12.41	5.16	8.35	5.23	66.5	5.5	65.22	5.71	61.02	5.52
15	58.95	12.66	26.96	14.04	23.19	9.52	73.84	8.39	26.35	6.09	14.96	6.56	11.81	5.59	69.66	7.06	68.14	6.54	62.28	7.4
16	53.25	12.17	23.41	12.26	21.26	8.15	60.27	7.11	20.7	5.52	7.81	7.32	7.2	5.53	58.03	5.96	58	5.92	53.41	6.8
17	61.81	13.2	28.96	13.15	21.86	10.46	76.65	8.42	27.2	7.57	14.42	6.82	9.67	6.6	70.88	7.45	68.31	8.27	61.04	8.37
18	55.71	11.46	24.79	12.43	21.97	7.65	67.6	7.47	25.74	5.86	12.2	6.35	8.94	4.75	64.93	6.71	63.03	6.55	57.89	6.73
19	69.05	14.3	33.1	14.67	25.24	11.57	81.03	8.67	30.29	6.91	15.16	7.24	9.5	6.53	78.39	8.08	75.59	8.1	72.17	8.22
20	65.86	12.53	30.89	12.88	24	10.08	77	8.42	26.29	5.04	15.53	5.54	9.88	5.11	70.49	7.17	68.49	6.43	66.06	6.86
21	61.89	11.82	31.97	10.83	26.73	9.5	78.71	8.12	28.81	5.66	14.03	8.05	13.82	5.85	72.15	6.92	69.14	6.98	62.38	7.16
22	63.24	12.08	33.38	11.5	22.58	8.61	75.56	5.84	32.02	5.22	16.43	5.6	11.36	4.82	71.43	7.33	67.11	6.94	63.93	6.21
23	59.59	13.83	28.94	12.93	22.1	10.63	76.44	7.12	26.08	6.34	12.86	7.85	9.78	5.81	72.33	5.83	69.77	5.85	66.36	7.15
24	54.77	12.27	26.98	10.55	18.49	9.43	67.79	7.21	23.93	5.19	11.21	7.14	8.59	6.27	61.67	5.47	61.02	5.42	57.61	6.15
25	61.86	13.25	27.23	12.53	20.23	9.47	71.78	7.68	25.14	5.97	9.29	7.07	8.65	5	68.59	7.76	65.07	6.74	61.63	6.7
26	59.53	12.62	27.19	12.42	23.34	10.47	69.79	6.41	27.52	5.92	13.55	6.32	9.42	4.33	67.51	6.7	64.38	5.97	60.32	6.46
27	54.13	11.33	26.31	11.2	20.36	9.02	67.54	6.33	25.19	6.88	14.46	6.56	8.79	5.62	63.79	6.25	60.97	5.87	56.62	7.9
28	58.19	10.33	26.84	11.08	20.34	9.11	71.88	6.75	25.17	6.48	13.13	7.35	8.54	6.37	68.08	6.6	68.9	6.59	63.14	7.56
29	51.59	11.43	24.21	11.66	21.15	8.63	61.53	6.05	22.06	5.55	10.44	5.66	8.62	5.95	59.17	5.15	58.22	5.49	53.97	6.21
30	53.38	12.75	25.96	12.16	21.12	7.9	62.98	7.68	24.56	6.45	11.81	6.96	9.42	5.54	59.87	7.01	57.18	5.94	53.59	6.91
31	59.27	12.82	26.1	13.99	22.42	8.72	70.79	8.52	25.34	5.88	13.34	6.86	8.23	5.91	68	6.33	65.57	6.81	59.41	6.95
32	56.4	11.21	27.25	10.83	22.38	8.27	71.31	6.06	26.18	5.61	14.25	6.08	6.9	6.08	68.01	6.36	65.84	6.03	60.57	6.14
33	59.29	11.08	28.21	10.71	23.29	7.32	75.24	8.55	27.77	5.98	13.1	6.91	8.75	5.13	71.23	7.21	68.9	6.87	65.14	7.09
34	50.22	11.43	22.49	12.15	19.21	8.28	61.17	4.92	19.92	6.45	8.53	7.09	8.46	6.04	62.02	5.64	58.89	6.69	52.36	6.44
35	59.02	13.24	25.51	14.42	24.16	9.74	74.85	7.77	27.46	6.55	10.48	8.68	8.45	6.15	71.7	7.11	68.61	7.63	63.55	7.15
36	63.07	15.14	28.69	14.65	24.91	8.69	77.54	8.64	29.86	6.37	15.78	6.79	11.85	5.38	74.87	8.36	72.09	7.11	68.23	9.09
37	57.4	11.48	28.17	12.07	18.38	8.22	70.62	6.06	24.1	5.47	13.02	6.2	9.57	4.44	66.49	5.9	64.48	6.5	56.72	7.58
38	56.75	12.49	26.36	12.53	25.03	10.08	66.28	6.56	24.96	5.86	14.81	6.65	8.63	4.76	61.91	5.69	61.1	5.78	58.51	6.25
39	61.88	12.45	29.94	13.25	26.17	9.05	71.81	7.07	27.3	5.69	14.88	6.75	11.63	5.08	67.1	7.76	65.76	6.56	62.08	6.09
40	51.68	11.94	26.36	11.92	19.57	4.91	64.46	7.33	22.56	5.23	14.01	7.1	9.53	6.12	63.27	6.18	59.85	6.43	53.44	6.38
41	58.7	10.67	28.69	10.55	20.44	7.2	69.69	7.41	25.81	5.57	13.06	6.28	9.49	6.27	66.22	6.28	64.66	6.56	59.84	6.64
42	53.23	10.31	26.03	10.26	19.5	7.93	69.09	6.58	21.85	5.52	10.77	6.11	6.96	5.12	65.56	6.27	62.68	5.83	56	59.6
43	59.56	13.08	27.67	12.81	22.7	11.28	72.72	8.02	25.53	7.27	12.56	8.78	8.03	6.16	68.68	6.93	66.48	6.95	58.1	7.27
44	50.78	11.29	23.89	10.67	19.1	4.22	62.4	5.93	20.79	6.02	10.96	6.11	7.09	5.67	58.4	4.87	58.09	6.6	51.76	6.71
45	59.7	11.71	26.98	12.55	23.92	10.09	73.18	7.32	27.49	5.9	15.08	6.51	10.35	5.91	67.44	5.84	65.22	5.98	61.4	7.24
46	61.48	13.39	28.82	12.87	20.99	9.26	75.84	6.62	25.93	7.35	12.38	6.83	11.08	5.62	70.42	6.8	67.2	6.91	61.8	7.32
47	56.22	11.05	26.9	10.94	22.29	10.52	68.1	7.14	26.02	5.66	11.62	6.58	8.08	6.09	64.26	5.88	61.26	6.18	56.12	6.24
48	54	11.02	27.27	10.4	21.08	10.21	65.2	6.37	26.29	5.34	12.53	6.3	8.98	6.5	68.5	6.71	62.27	6.17	57.07	6.19
49	54	11.43	23.64	12.14	20.89	9.37	62.58	6.51	23.13	4.44	10.82	5.75	9.8	4.89	60.74	6.05	58.7	6.98	53.61	6.83
50	56.55	11.71	26.84	11.79	19.33	8.24	67.63	6.24	23.46	6.11	10.48	6.54	10.22	5.13	64.5	5.89	63.91	5.82	61.2	6.67
51	60.04	14.11	30.62	12.75	19.96	9.51	72.47	8.03	26.64	6.08	13.26	6.81	7.21	5.92	66.83	6.16	65.99	7.3	61.64	7.75
52	58	12.8	27.68	13.17	20	8.11	69.63	7.02	26.92	6.5	14.83	6.69	9.19	5.08	64.83	6.19	62.46	6.73	55.38	7.52
53	54.32	12.07	25.62	10.9	22.17	8.27	66.11	6.24	22.17	4.09	7.62	7.14	8.76	4.95	60.96	6.21	62.29	6.44	56.92	7.15
54	50.34	9.87	23.44	9.86	17.44	7.87	63.01	5.18	19.23	4.09	9.89	4.93	7.72	4.31	59.76	5.59	56.33	5.47	50.58	6
55	60.98	13.2	27.89	13.33	23.81	9.51	69.13	8.01	25.34	5.66	12.34	6.88	9.98	5.27	66.37	7.35	64.08	7.56	64.41	8.83
56	56.51	13.5	25.44	13.6	22.04	10.26	66.96	6.89	23.58	6.03	9.18	9.94	9.53	5.98	64.11	5.04	59.43	7.34	53.41	7.02
57	61.07	13.12	26.83	13.2	21.48	10.2	72.95	7.74	24.4	5.53	14.27	6.34	10.06	5.02	66.08	6.03	65.08	6.46	60.97	6.93
58	61.38	12.7	30.36	11.67	20.79	9.08	71.24	7.2	27.27	6.34	14.08	6.29	11.09	4.51	71.88	5.93	68.91	5.49	62.53	6.37
59	56.95	10.13	29.1	10.85	20.48	8	67.97	7.07	25.6	5.6	13.25	5.99	9.71	5.18	64.62	6.6	60.16	5.74	56.91	6.16
60	55.08	12.26	25.02	12	20.97	8.78	64.43	7.9	25.3	5.89	11.67	8.32	9	7.18	63.04	6.11	61	6.96	55.93	6.88
61	55.21	10.52	28.76	10.4	20.4	9.43	67.14	5.89	25.5	4.97	10.96	6.82	10.08	4.92	65.23	5	62.83	5.61	59.92	6.84
62	56.68	12.42	26.78	12.26	18.56	8.19	67.58	6.13	26.57	6.41	9.08	7.9	9.13	5.76	63.44	6.24	62.98	6.83	56.82	6.73
63	57.54	13.55	28.1	13.68	22.48	8.94	72.28	8.22	25.08	7.02	13.56	6.62	8.39	5.7	67.3	7.11	63.54	6.35	60.86	6.44
64	59.46	12.36	27.58	10.87	22.96	8.26	71.77	7.09	25.22	4.43	13.02	6.05	8.3	4.56	69.02	6.2	67.31	6.51	62.57	7.27
65	59.43	9.77	29.37	9.56	21.18	7.99	72.21	6.75	24.68	3.38	13.93	5.34	7.99	4.83	67.94	5.98	63.59	5.31	60.86	5.27
66	48.54	10.65	23.33	9.2	16.73	7.24	57.47	5.73	21.11	4.86	9.25	5.65	7.46	4.13	51.72	5.4	57.51	5.71	45.5	7.47
67	49.48	10.02	29.4	10.31	18.44	7.93	58.05	5.65	22	5.02	10.13	7.03	7.71	5.79	55.11	5	53.16	4.79	52.14	6.28
68	57.91	13.03	27.69	11.12	20.02	9.03	71.36	7	24.57	5.08	10.95	7.33	9.16	6.48	67.75	6.77	65.46	7.05	63.2	8.56
69	54.81	13.31	24.58	13.89	21.65	10.3	67.56	7.74	23.91	6.25	13.02	6.24	7.51	5.62	62.5	6.56	60.49	6.42	56.35	7.67
70	51.99	11.81	25.11	10.57	18.53	8.92	57.44	6.35	22.38	6.03	10.11	6.03	8.61	4.52	56.26	6.62	53.41	6.63	51.3	7.1
71	54.24	12.25	26.7	11.54	19.36	8.93	67.93	6.5	23.63	6.1	11.86	6.64	8.07	6.43	62.66	6.34	60.08	6.47	54.13	7.21
72	59.5	13.07	27.57	12.8	21.51	10.11	71.71	7.58	25.4	7.01	11.83	7.43	10.5	4.76	66.96	7.95	65.89	7.63	56.8	8.56
73	65.77	13.6	32.1	12.39	25.76	9.97	82.1	7.57	28.01	5.37	10.77	6.74	8.2	6.75	78.01	7.42	75.41	6.7	73.32	8.12
74	59.9	11.51	29.02	10.41	19.23	9.73	71.59	5.57	26.47	4.01	11.17	5.31	9.36	4.5	70.88	6.24	66.44	6.22	59.57	6.77
75	60.89	12.21	29.97	12.54	18.3	8.06	72.21	8.05	25.75	6.16	12.39	6.76	9.83	4.91	67.57	7.62	66.49	7.56	62.4	7.24
76	56.14	10.35	28.53	11.18	20.92	8.26	65.24	6.17	25.27	5.76	13.25	5.93	8.2	5.5	62.28	5.7	59.69	5.52	54.29	6.06
77	51.48	10.69	24.71	10.48	19.53	8.18	63.67	6.51	21.26	4.76	7.66	6.15	8.09	6.24	58.23	6.28	56.61	6.22	50.91	6.69
78	57.33	12.3	27.09	11.95	21.02	8.59	67.57	7.27	27.44	5.31	12.95	5.24	9.7	4.53	65.05	6.22	63.69	5.62	59.61	6.61
79	55.54	14.02	25.55	14.13	22.51	8.22	61.85	5.74	24.52	5.47	12.69	6.1	9.31	4.58	59.25	5.71	57.65	6.89	53.11	7.35
80	65.24	12.23	31.51	10.14	24.77	7.86	77.48	7.23	27.01	4.46	13.1	5.84	9.21	3.89	72.41	6.24	72.24	6.97	69.06	6.98
81	59.71	13.29	28.89	15.02	25.21	10.08	68.27	7.69	27.42	5.9	14	7.39	10.32	5.62	63.85	7.63	61.55	7.32	57.64	7
82	61.62	11.63	30.65	11.71	26.78	7.71	71.05	5.58	27.46	5.23	17.25	6.25	9.33	6.9	67.68	6.98	66.91	6.71	64.15	6.64
83	55.81	9.41	28.09	10.06	20.56	8.78	66.11	4.86	24.78	4.84	10.38	5.8	10.53	4.49	60.41	5.4	58.84	5.34	58.68	6.01
84	57.87	15.46	23.94	14.05	23.49	8.48	66.38	7.86	25.6	5.98	13.3	5.5	10.51	4.93	62.68	6.87	62.12	6.93	59.53	7.38
85	71.94	14.22	32.33	12.78	24.68	10.13	79.63	9.85	28.41	6.48	14.26	7.21	10.37	6.37	75.61	8.03	74.83	7.89	71.25	8.24
86	57.38	14.46	29.26	13.61	23.89	10.49	70.46	9.07	27.33	6.21	9.73	7.73	10.99	5.17	65.76	6.99	64.47	8.06	61.51	6.42
87	62.41	11.25	29.42	11.02	22.73	9.25	72.83	6.4	27.49	4.07	11.04	6.14	8.09	4.73	71.23	5.94	69.8	6.73	67.65	6.71
88	58.12	10.05	29	10.34	21.18	7.13	72.3	7.54	25.84	4.83	12.68	5.37	9.4	5.13	67.06	7.06	65.74	6.03	62.13	6.54
89	59.04	11.85	28.64	11.32	23.83	9.82	72.1	7.04	25.71	4.27	10.13	6.67	8.83	5.01	68.03	5.7	66.43	6.26	62.38	6.35
90	63	14.85	29.91	13.9	25.28	9.29	74.87	8.82	28.41	6.98	16.74	7.72	10.78	6.12	71.65	7.5	68.7	7.06	65.61	7.18
91	65.94	13.69	29.56	13.1	23.65	8.17	77.45	8.1	27.51	4.92	12.87	7.35	9.19	4.35	71.37	6.32	69.04	6.57	64.94	7.84
92	56.76	11.83	28.53	11.68	23.17	8.53	71	6.42	25.09	6.41	8.94	7.37	12.12	5.33	67.7	6.85	65.42	5.61	63.06	6.44
93	58.8	13.13	28.63	13.18	24.44	7.91	74.94	7.09	27.47	4.95	13.64	8.33	9.8	6.73	70.2	6.71	69.14	7.14	65.09	8.74
94	67.73	13.05	32.45	13.54	26.62	10.12	76.64	7.26	28.26	6.12	12.44	7.8	12.25	4.89	72.03	7.31	69.88	7.67	64.66	7.13
95	64.51	12.63	31.06	11.18	20.54	7.36	70.28	6.1	25.11	4.85	12.15	6.42	9.37	4.73	65.09	6.34	62.87	6.2	60.92	7.15
96	59.55	13.56	31.07	12.9	25.48	10.04	71.5	7.5	28.89	6.42	16.28	7.14	11.79	5.89	68.51	6.99	65.08	6.32	60.1	7.14
97	63.81	14.11	30.24	13.24	26.16	9.09	75.3	7.38	27.93	4.87	9.83	8.49	13.22	5.39	70.89	6.82	67.33	6.66	66.22	7.7
98	55.68	10.83	26.83	10.28	19.93	7.77	67.07	7.84	24	4.15	14.83	5.29	9.16	4.4	63.09	6.71	59.95	6.22	56.72	5.9
99	67.76	13.74	31.02	13.84	26.05	9.38	78.1	8.07	29.97	5.78	8.78	9.85	11.42	5.22	74.47	7.29	70.75	6.48	64.44	6.77
100	51.31	12.67	30.16	12.38	21.83	10.21	59.62	6.39	27.43	6.04	13.13	7.71	9.38	5.62	57.82	6.63	57.61	6.68	52.83	8.2
